# Supplementary material
Source: PubMed Central journal article supplement (PMC4927336)
Supplement: NIHMS793011-supplement-01.pdf [file NIHMS793011-supplement-01.pdf]

## Figure legends

**Figure 1.** Admixture proportions assessed with ADMIXTURE for the SAGE II participants included in this study: a.) Cases, b.) Controls. Each vertical bar represents one individual and colors display the proportions of European (blue) and African (red) ancestry.

**Figure 2.** Quantile-quantile plot of the GWAS of asthma.

**Figure 3.** Manhattan plot of the GWAS of asthma. In the x-axis the chromosomal position of each SNP is represented and in the y-axis the  $-\log_{10}$  transformation of the association p-value for each SNP.

**Figure S1.** Post-hoc Power Calculations for Detectable Effect Sizes in the SAGE II population.

## Disclosure

EGB has been funded by the National Institutes of Health (R01ES015794 and P60-MD006902); the Sandler Foundation, the RWJF Amos Medical Faculty Development Award, and the American Asthma Foundation. MPY has received honoraria for speaking at symposium from Affymetrix. The rest of authors report no conflicts of interest in this work.
